# Supplementary material for: A self-supported S-doped Fe-based organic framework platform enhances electrocatalysis toward highly efficient oxygen evolution in alkaline media
Source: Royal Society of Chemistry journal article supplement (doi:10.1039/d2ta04857d), 2022-01-01
Supplement: d2ta04857d1.pdf [file d2ta04857d1.pdf]

## Electronic Supplementary Information

### **Self-supported S-doped Fe-based organic framework platform enhances electrocatalysis toward highly efficient oxygen evolution in alkaline media**

Cong Ling,<sup>†a</sup> Xinyan Leng,<sup>‡a</sup> Xiao-Jie Lu,<sup>a</sup> Jing-Han Li,<sup>a</sup> Zhengkun Yang<sup>\*b</sup> and An-Wu Xu<sup>\*a</sup>

<sup>a</sup>Division of Nanomaterials and Chemistry, Hefei National Research Center for Physical Sciences at the Microscale, University of Science and Technology of China, Hefei, Anhui 230026, People's Republic of China.

<sup>b</sup>Institutes of Physical Science and Information Technology, Anhui Graphene Engineering Laboratory, Key Laboratory of Structure and Functional Regulation of Hybrid Materials, Ministry of Education. Anhui University, Hefei, Anhui 230601, China.

\*To whom correspondence should be addressed.

Zhengkun Yang; yangzk@ustc.edu.cn

An-Wu Xu; anwuxu@ustc.edu.cn

<sup>‡</sup>Cong Ling and Xinyan Leng contributed equally to this work

## Supporting data

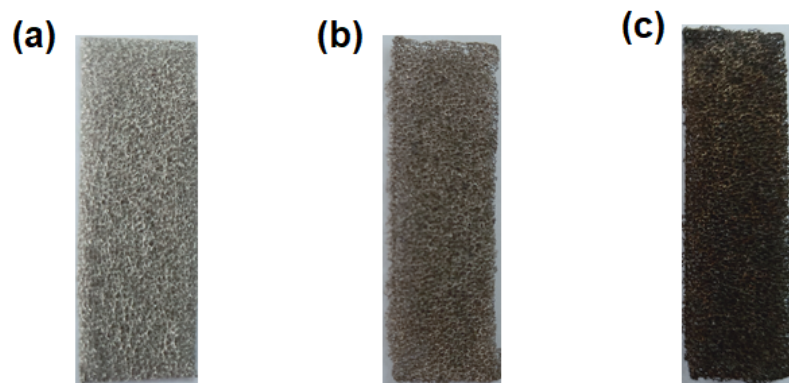

**Figure S1.** Photograph of (a) NF, (b) Fe-BTB/NF, (c)  $S_{0.05}$ -Fe-BTB/NF.

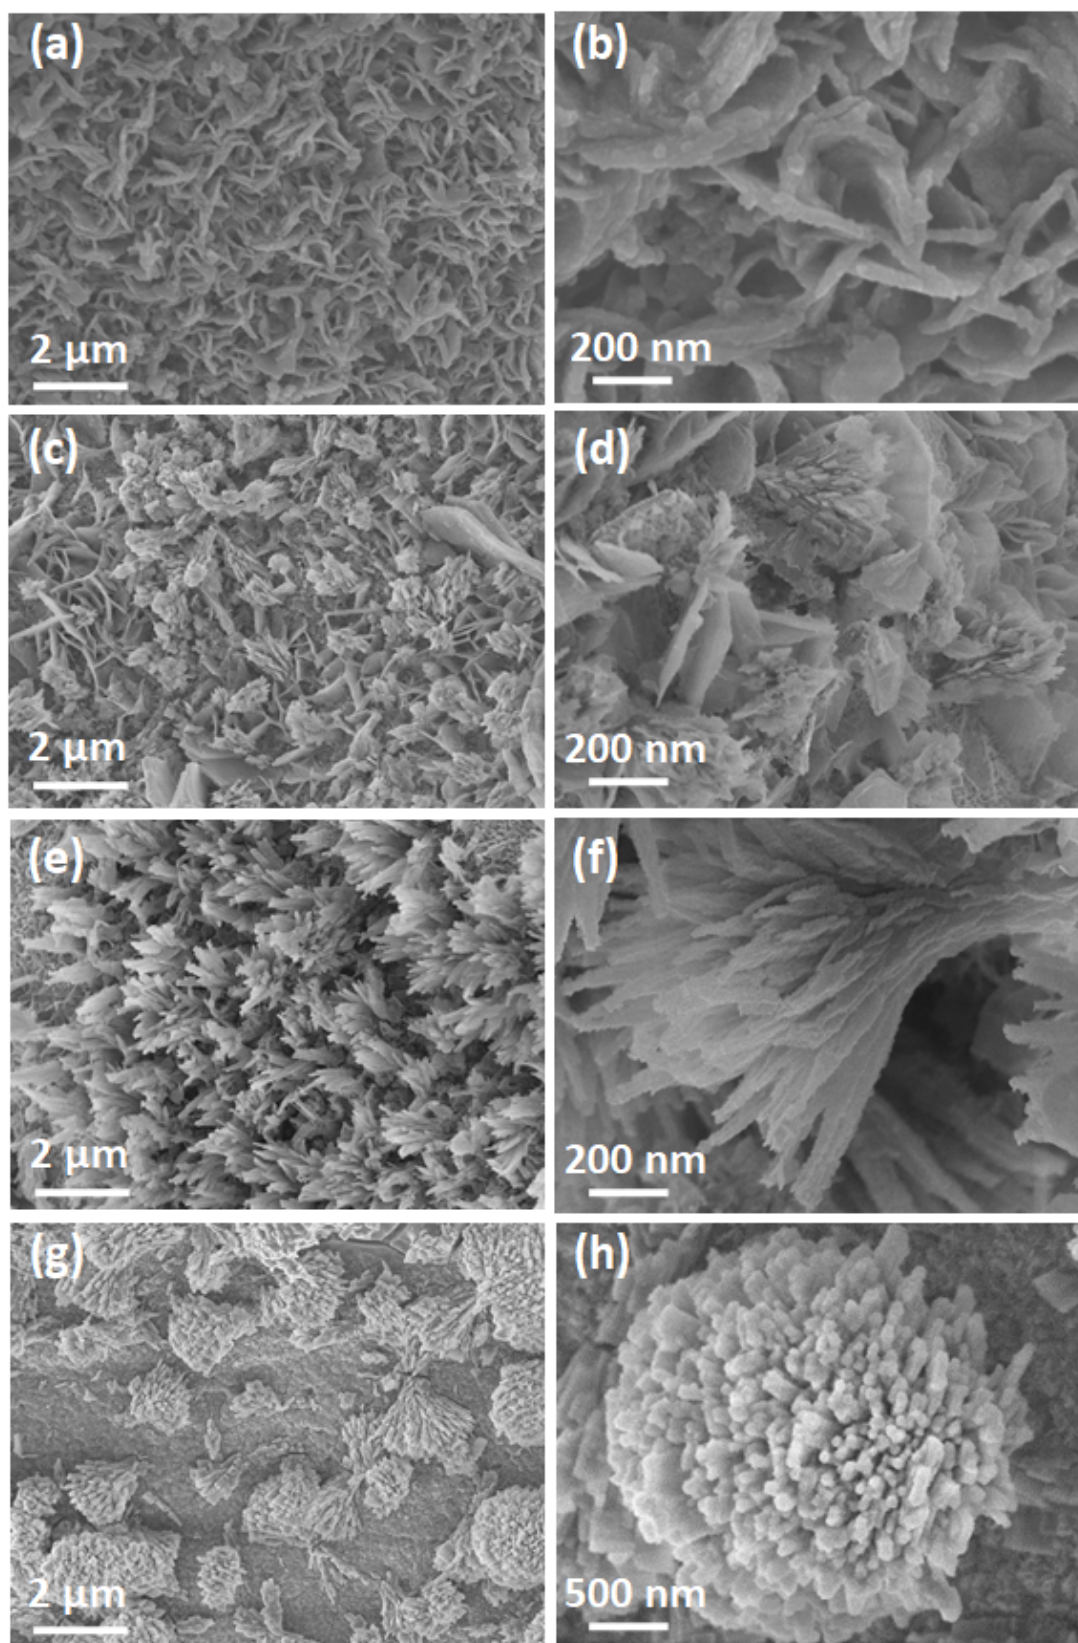

**Figure S2.** The low- and high-magnification FE-SEM images of (a) Fe-BTB/NF, (b) S<sub>0.025</sub>-Fe-BTB/NF, (c) S<sub>0.05</sub>-Fe-BTB/NF and (d) S<sub>0.075</sub>-Fe-BTB/NF.

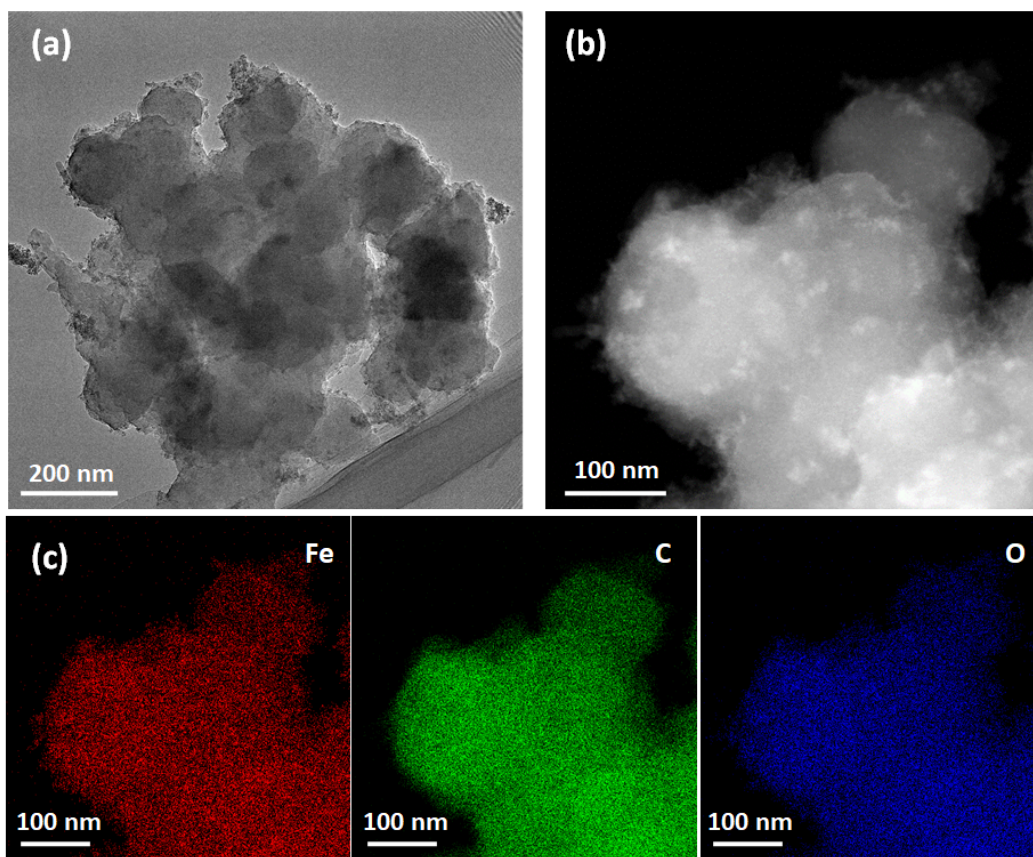

**Figure S3.** (a) TEM, (b) HAADF-STEM image and (c) corresponding element mapping images of Fe-BTB/NF.

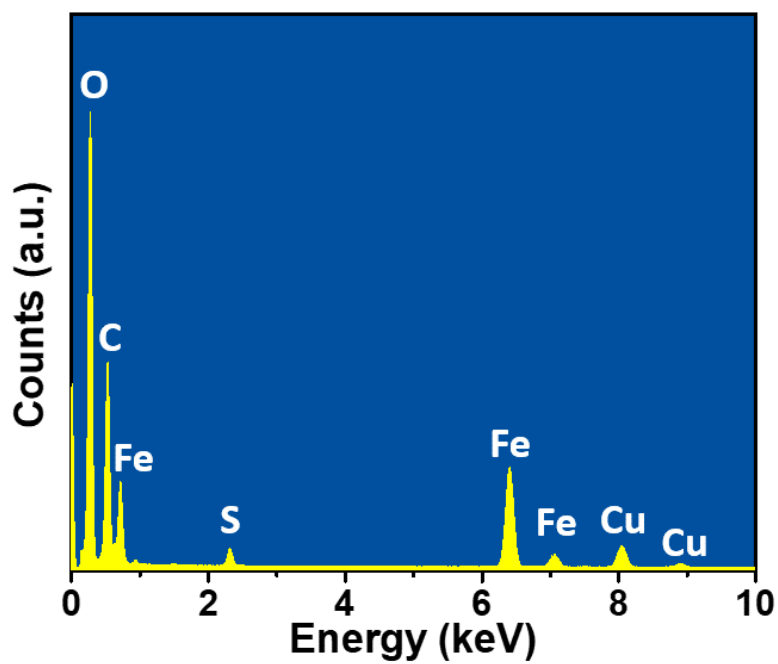

**Figure S4.** EDS spectrum of as-prepared  $S_{0.05}$ -Fe-BTB/NF.

**Table S1.** Element percentage of S<sub>0.05</sub>-Fe-BTB/NF obtained from EDS, and XPS.

| Elements | Weight% (EDS) | Atom% (EDS) | Weight% (XPS) | Atom% (XPS) |
|----------|---------------|-------------|---------------|-------------|
| Fe       | 18.08         | 4.78        | 15.2          | 4.0         |
| S        | 1.47          | 0.68        | 1.5           | 0.6         |
| O        | 14.00         | 12.90       | 20.6          | 20.9        |
| C        | 66.45         | 81.64       | 62.7          | 74.5        |
| Total    | 100           | 100         | 100           | 100         |
| Fe:S     | 12.3:1        | 7.0:1       | 10.1:1        | 6.7:1       |

**Table S2.** The Fe and S contents of synthesized S<sub>x</sub>-Fe-BTB/NF catalysts measured by ICP-OES.

| Catalyst                      | Fe (weight%) | S (weight%) | Fe:S (weight) | Fe:S (atom) |
|-------------------------------|--------------|-------------|---------------|-------------|
| Fe-BTB/NF                     | 12.53        | -           | -             | -           |
| S <sub>0.025</sub> -Fe-BTB/NF | 12.19        | 0.51        | 24.0:1        | 13.7:1      |
| S <sub>0.05</sub> -Fe-BTB/NF  | 11.34        | 0.95        | 11.9:1        | 6.9:1       |
| S <sub>0.075</sub> -Fe-BTB/NF | 10.71        | 1.39        | 7.7:1         | 4.4:1       |

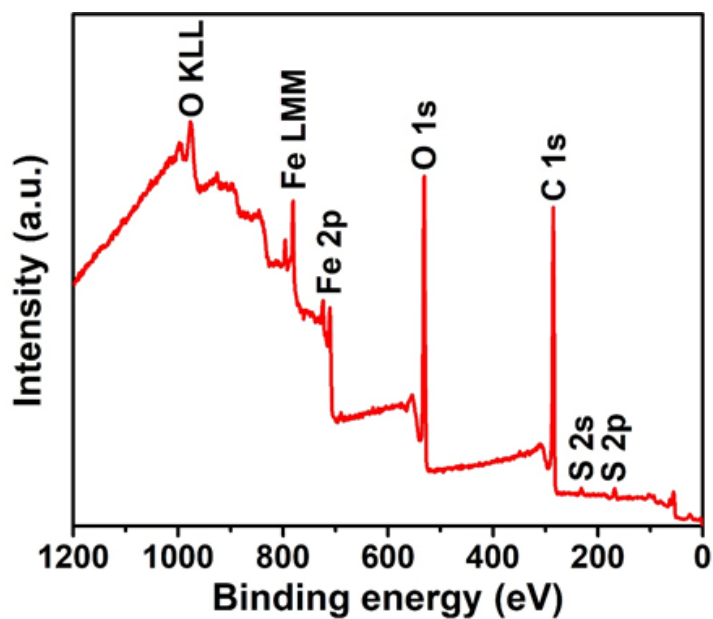

Figure S5. XPS survey spectrum of  $S_{0.05}$ -Fe-BTB/NF sample.

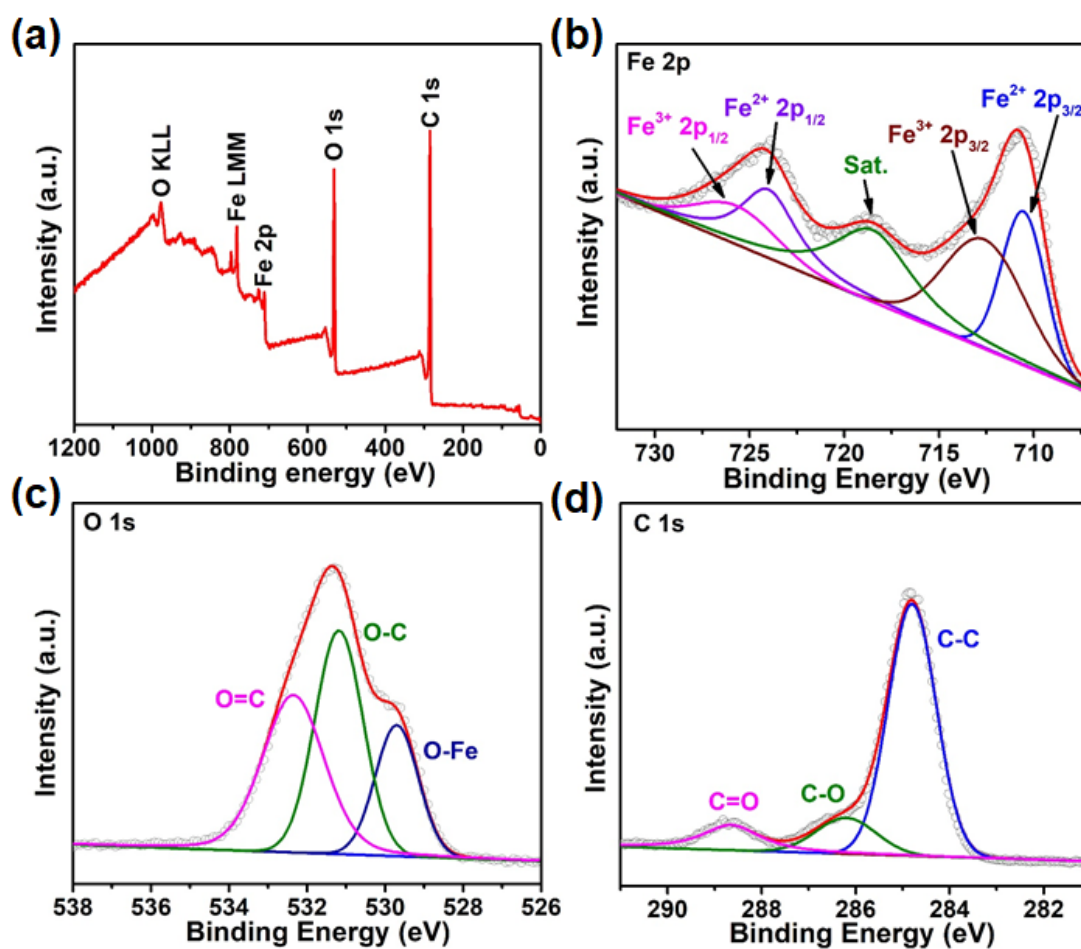

Figure S6. (a) XPS survey spectrum, (b) High-resolution XPS spectrum of Fe 2p, (c) O 1s, and (d) C 1s of as-prepared Fe-BTB/NF sample.

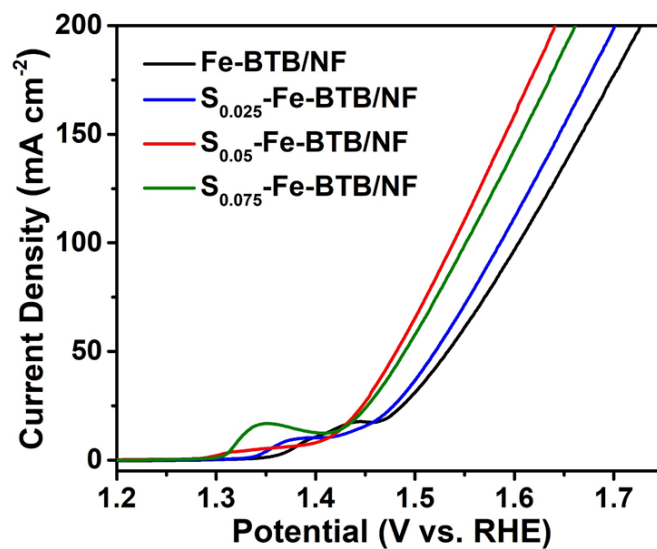

**Figure S7.** The linear sweep voltammetry (LSV) curves of Fe-BTB/NF doped with different sulfur content in 1.0 M KOH.

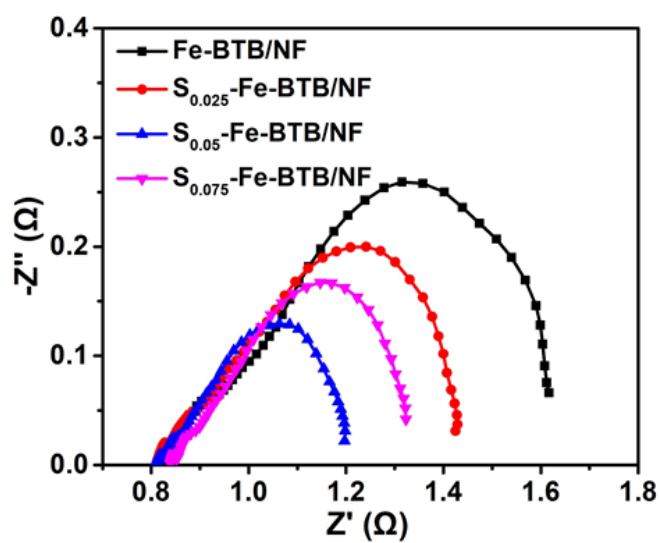

**Figure S8.** Electrochemical impedance spectroscopy for  $S_x$ -Fe-BTB/NF various thiourea added amount at an applied potential of 1.5 V (vs. RHE).

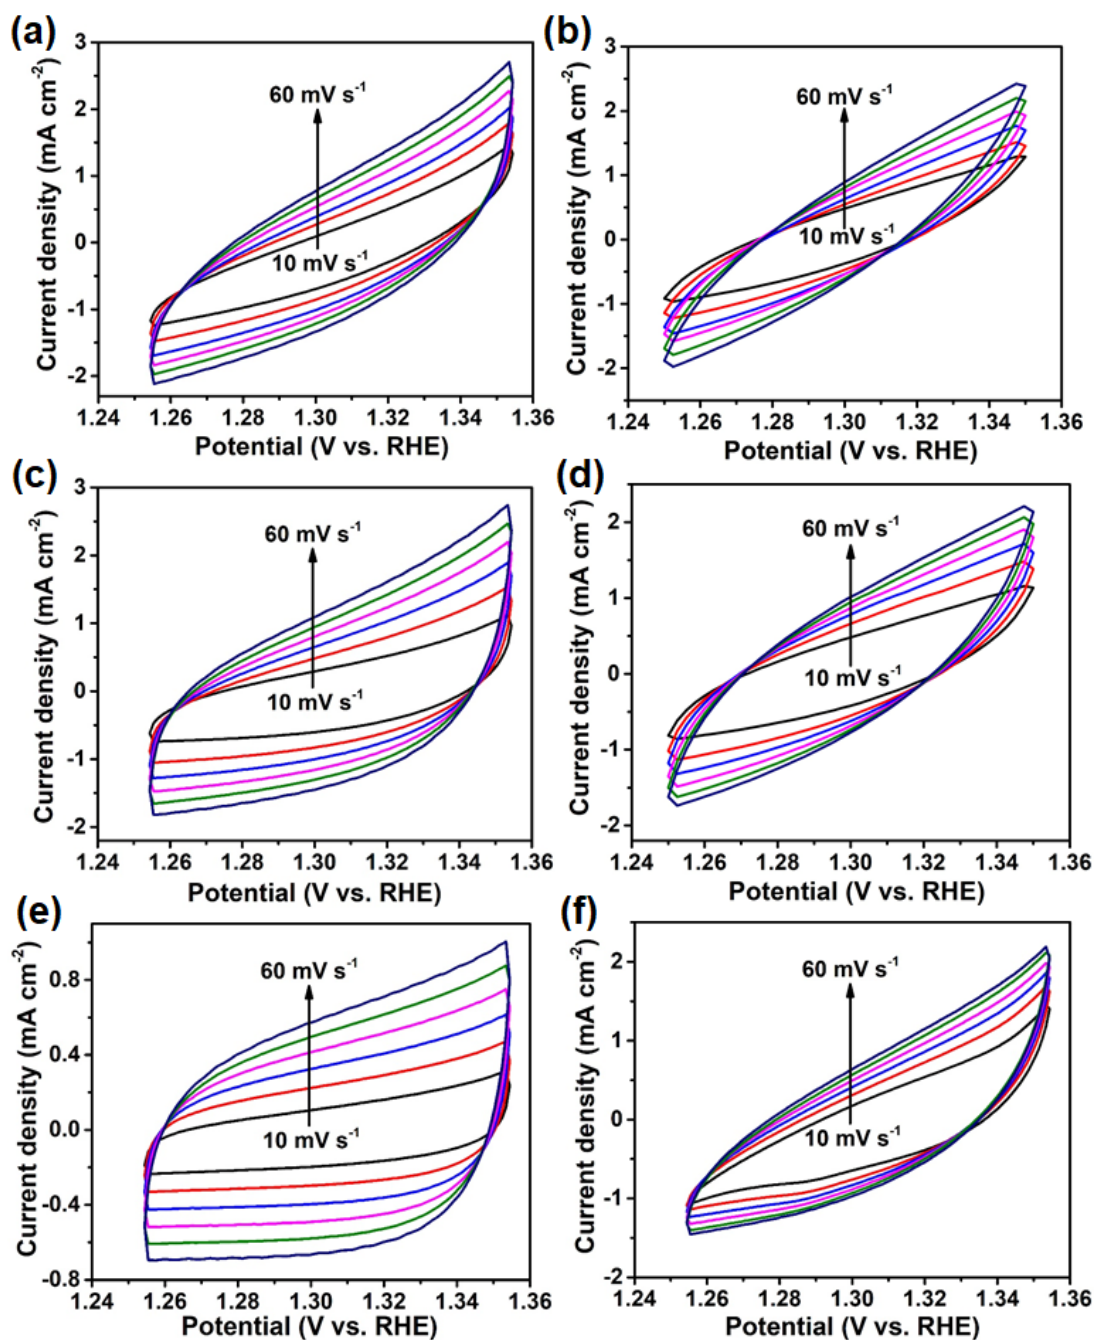

**Figure S9.** CV curves of as-prepared catalysts at different scan rates in 1.0 M KOH. (a) Fe-BTB/NF, (b)  $S_{0.025}$ -Fe-BTB/NF, (c)  $S_{0.05}$ -Fe-BTB/NF, (d)  $S_{0.075}$ -Fe-BTB/NF, (e) bare NF, (f)  $\text{RuO}_2$ /NF.



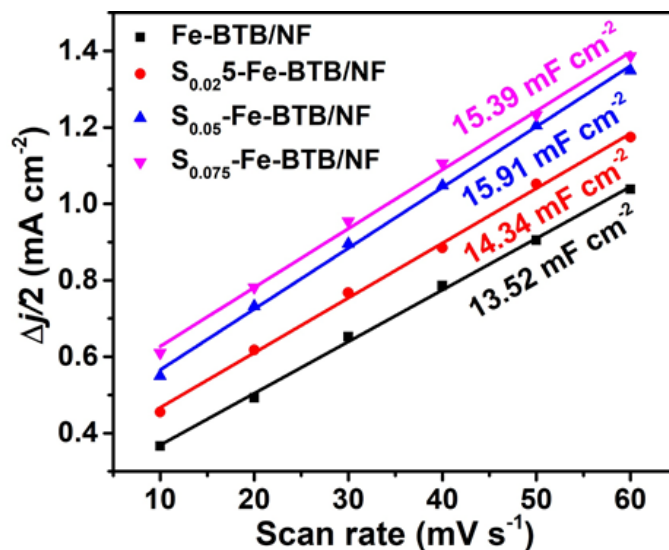

**Figure S10.** The Plots showing the extraction of the  $C_{dl}$  for the estimation of the ECSA for  $S_x$ -Fe-BTB/NF various thiourea added amount acquired at an applied potential of 1.3 V vs. RHE.

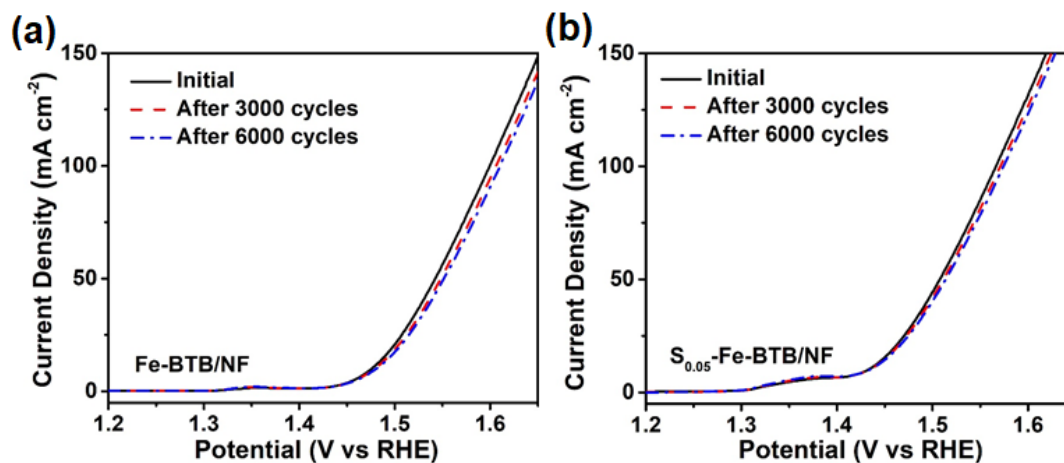

**Figure S11.** LSV curves of (a) Fe-BTB/NF and (b)  $S_{0.05}$ -Fe-BTB/NF before and after 6000 potential cycling tests in 1.0 M KOH between 1.2 and 1.5 V vs. RHE at a scan rate of  $50 \text{ mV s}^{-1}$ .

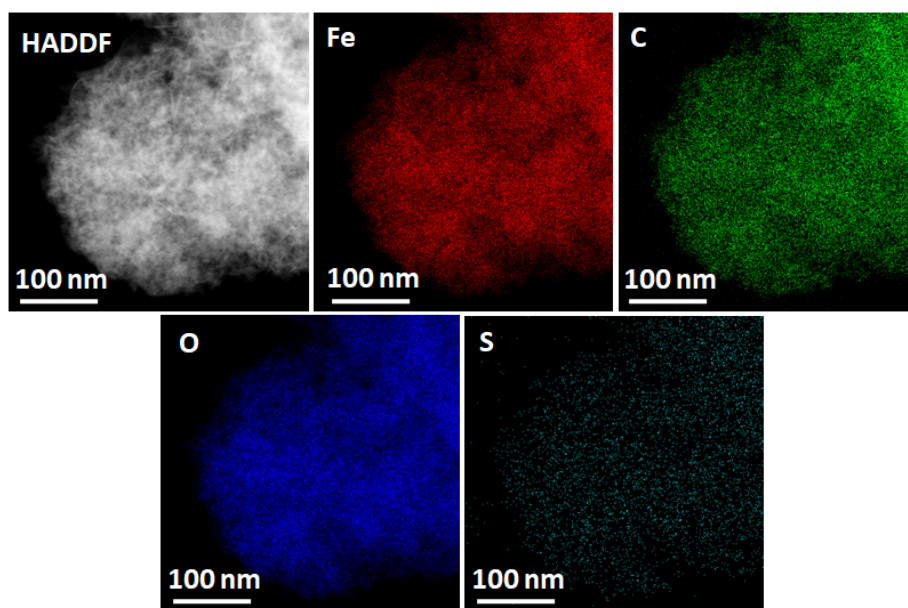

**Figure S12.** HAADF-STEM image and corresponding EDS element mapping images of  $S_{0.05}$ -Fe-BTB/NF after OER electrocatalysis.

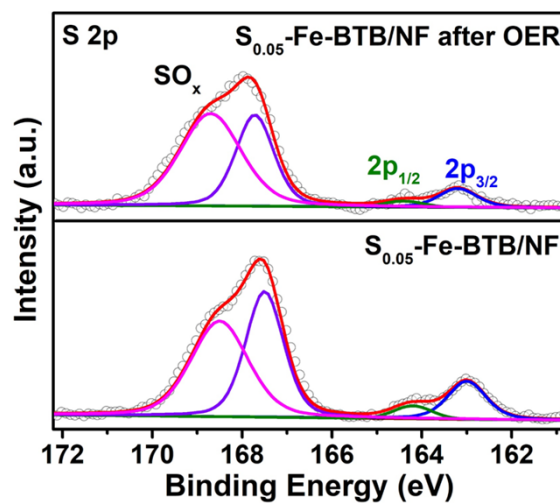

**Figure S13.** Comparison of high resolution S 2p XPS spectra of  $S_{0.05}$ -Fe-BTB/NF before and after OER stability test.

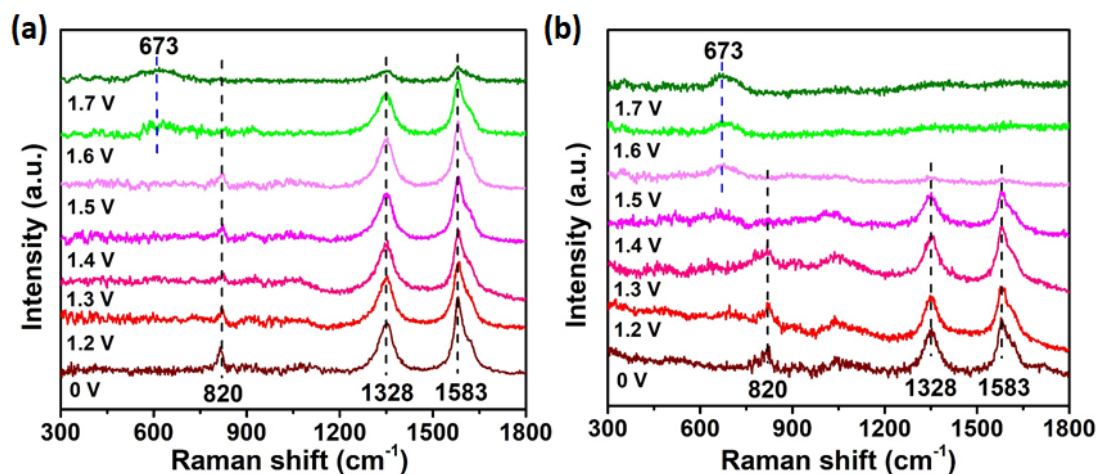

**Figure S14.** *Operando* Raman spectroscopy measurements of (a) Fe-BTB/NF and (b)  $S_{0.05}$ -Fe-BTB/NF catalysts, respectively.

**Table S3.** Comparison of OER performance in 1.0 M KOH for  $S_{0.05}$ -Fe-BTB/NF with other reported Fe-based electrocatalysts and MOFs as electrocatalysts loaded on conductive substrate ( $j$ : Current density;  $\eta_j$ : Overpotential at the corresponding current density).

| Catalyst                                                 | $j$<br>(mA cm <sup>-2</sup> ) | $\eta_j$<br>(mV) | Tafel Slope<br>(mV dec <sup>-1</sup> ) | References                                      |
|----------------------------------------------------------|-------------------------------|------------------|----------------------------------------|-------------------------------------------------|
| $S_{0.05}$ -Fe-BTB/NF                                    | <b>20</b>                     | <b>231</b>       | <b>41</b>                              | <b>This work</b>                                |
| Fe-BTB/NF                                                | <b>20</b>                     | <b>268</b>       | <b>44</b>                              | <b>This work</b>                                |
| NiFe-LDH/NF                                              | 20                            | 260              | 50                                     | Chem. Commun., 2014, 50, 6479                   |
| Ni <sub>1.85</sub> Fe <sub>0.15</sub> P<br>NSAs/NF       | 20                            | 270              | 96                                     | ACS Appl. Mater. Interfaces, 2017, 9, 31, 26001 |
| (Ni <sub>0.5</sub> Fe <sub>0.5</sub> ) <sub>2</sub> P/NF | 20                            | 219              | 57                                     | J. Mater. Chem. A, 2017, 5, 11229               |
| FeOOH(Se)/IF                                             | 10                            | 287              | 54                                     | J. Am. Chem. Soc., 2019, 141, 7005              |
| FeOOH/Co/                                                | 20                            | 250              | 32                                     | Angew. Chem. Int. Ed.,                          |

|                                                                                |    |      |    |                                                |
|--------------------------------------------------------------------------------|----|------|----|------------------------------------------------|
| FeOOH-NF                                                                       |    |      |    | 2016, 55, 3694                                 |
| FeSe <sub>2</sub> /NF                                                          | 10 | 245  | -  | Angew. Chem. Int. Ed.,<br>2017, 56, 1056       |
| Fe-Ni <sub>3</sub> S <sub>2</sub> /FeNi                                        | 20 | ~320 | 54 | Small, 2017, 13, 1604161                       |
| S-NiFe <sub>2</sub> O <sub>4</sub> /NF                                         | 10 | 267  | 37 | Nano Energy, 2017, 40, 264                     |
| FeNi/NiFe <sub>2</sub> O <sub>4</sub> @<br>NC-800                              | 10 | ~316 | 60 | ACS Appl. Mater.<br>Interfaces, 2016, 8, 34396 |
| FeNi LDH-rGO                                                                   | 10 | 210  | 39 | Angew. Chem. Int. Ed.,<br>2014, 53, 7584       |
| Ru-MnFeP/NF                                                                    | 20 | 191  | 69 | Adv. Energy Mater., 2020,<br>10, 2000814       |
| Co <sub>3</sub> O <sub>4</sub> /Fe <sub>0.33</sub> Co <sub>0.66</sub> P<br>/NF | 50 | 215  | 60 | Adv. Mater., 2018, 30,<br>1803551              |
| (Ni <sub>2</sub> Co) <sub>0.975</sub> Fe <sub>0.075</sub> -<br>MOF-NF          | 10 | 257  | 41 | Adv. Mater., 2019, 31,<br>1901139              |
| FeNi <sub>2</sub> S <sub>4</sub> /GA/NF                                        | 20 | ~290 | 66 | J. Mater. Chem. A, 2018, 6,<br>19417           |
| NiFe LDH<br>@NiCoP/NF                                                          | 10 | 220  | 49 | Adv. Funct. Mater., 2018,<br>28, 1706847       |
| 7.5-1h LDH-<br>MOF@NF                                                          | 10 | 275  | 47 | Adv. Funct. Mater., 2019,<br>29, 1903875       |
| NiFeMn-LDH/CP                                                                  | 20 | 289  | 47 | Chem. Commun., 2016, 52,<br>908                |
| NiFe-MOF-74/NF                                                                 | 20 | ~240 | 76 | Chem. Commun., 2018, 54,<br>7046               |
| NiFe-LDH/CNT                                                                   | 10 | ~240 | 40 | Nat. Commun., 2014, 5,<br>4477                 |
| W <sub>0.5</sub> Co <sub>0.4</sub> Fe <sub>0.1</sub> /NF                       | 10 | 250  | 32 | Angew. Chem. Int. Ed.,<br>2017, 56, 4502       |
| Fe <sub>17.5%</sub> -Ni <sub>3</sub> S <sub>2</sub> /NF                        | 20 | 222  | 42 | ACS Catal., 2018, 8, 5431                      |
| FeCoP UNSAs/NF                                                                 | 20 | 260  | 63 | Nano Energy, 2017, 41, 583                     |

|                            |     |      |      |                                            |
|----------------------------|-----|------|------|--------------------------------------------|
| NFN-MOF/NF                 | 20  | ~260 | 58.8 | Adv. Energy Mater., 2018, 8, 1801065       |
| NiFe-MOF/NF                | 10  | 240  | 34   | Nat. Commun., 2017, 8, 15341               |
| CoFePO@NF                  | 20  | ~295 | 52   | ACS Nano, 2016, 10, 8738                   |
| NiFe LDH@NiCoP/NF          | 10  | 220  | 48.6 | Adv. Funct. Mater., 2018, 28, 1706847      |
| Am FePO <sub>4</sub> /NF   | 10  | 218  | 43   | Adv. Mater., 2017, 29, 1704574             |
| FeOOH/Ni <sub>3</sub> N/CC | 20  | ~265 | 65   | Appl. Catal. B, 2020, 269, 118600          |
| NiMo-PVP/NiFe-PVP/CC       | 10  | 297  | 48   | Adv. Energy Mater., 2017, 7, 1700220       |
| NiO/NiFe LDH/CP            | ~30 | 205  | 30   | Adv. Mater., 2019, 31, 1804769             |
| NiFe-LDH@NiCu              | 10  | 218  | 57   | Adv. Mater., 2019, 31, 1806769             |
| NiFe LDH/CNT               | 10  | 247  | 31   | J. Am. Chem. Soc., 2013, 135, 8452         |
| NiFe LDHs@FeOOH/NF         | 10  | 208  | 42   | ACS Appl. Mater. Interfaces, 2017, 9, 464. |

**Table S4.** The concentration of electrochemical extraction of Fe species of synthesized Fe-BTB/NF and S<sub>0.05</sub>-Fe-BTB/NF catalysts measured by ICP-MS after 6000 CV cycles.

| Catalyst                     | Fe content from electrochemical extraction |  |
|------------------------------|--------------------------------------------|--|
|                              | (mg L <sup>-1</sup> )                      |  |
| Fe-BTB/NF                    | 0.038                                      |  |
| S <sub>0.05</sub> -Fe-BTB/NF | 0.018                                      |  |
